# Supplementary material for: Genetically engineered rice endogenous 5-enolpyruvoylshikimate-3-phosphate synthase (epsps) transgene alters phenology and fitness of crop-wild hybrid offspring
Source: PubMed Central journal article supplement (PMC5533792; doi:10.1038/s41598-017-07089-9), 2017-07-28
Supplement: 41598_2017_7089_MOESM1_ESM.pdf [file 41598_2017_7089_MOESM1_ESM.pdf]

# Genetically engineered rice endogenous 5-enolpyruvylshikimate-3-phosphate synthase (*epsps*) transgene alters phenology and fitness of crop-wild hybrid offspring

Xiao Yang<sup>1</sup>, Lei Li<sup>1</sup>, Xiaoqi Jiang<sup>1</sup>, Wei Wang<sup>1</sup>, Xingxing Cai<sup>1</sup>, Jun Su<sup>2</sup>, Feng Wang<sup>2</sup>, Bao-Rong Lu<sup>1\*</sup>

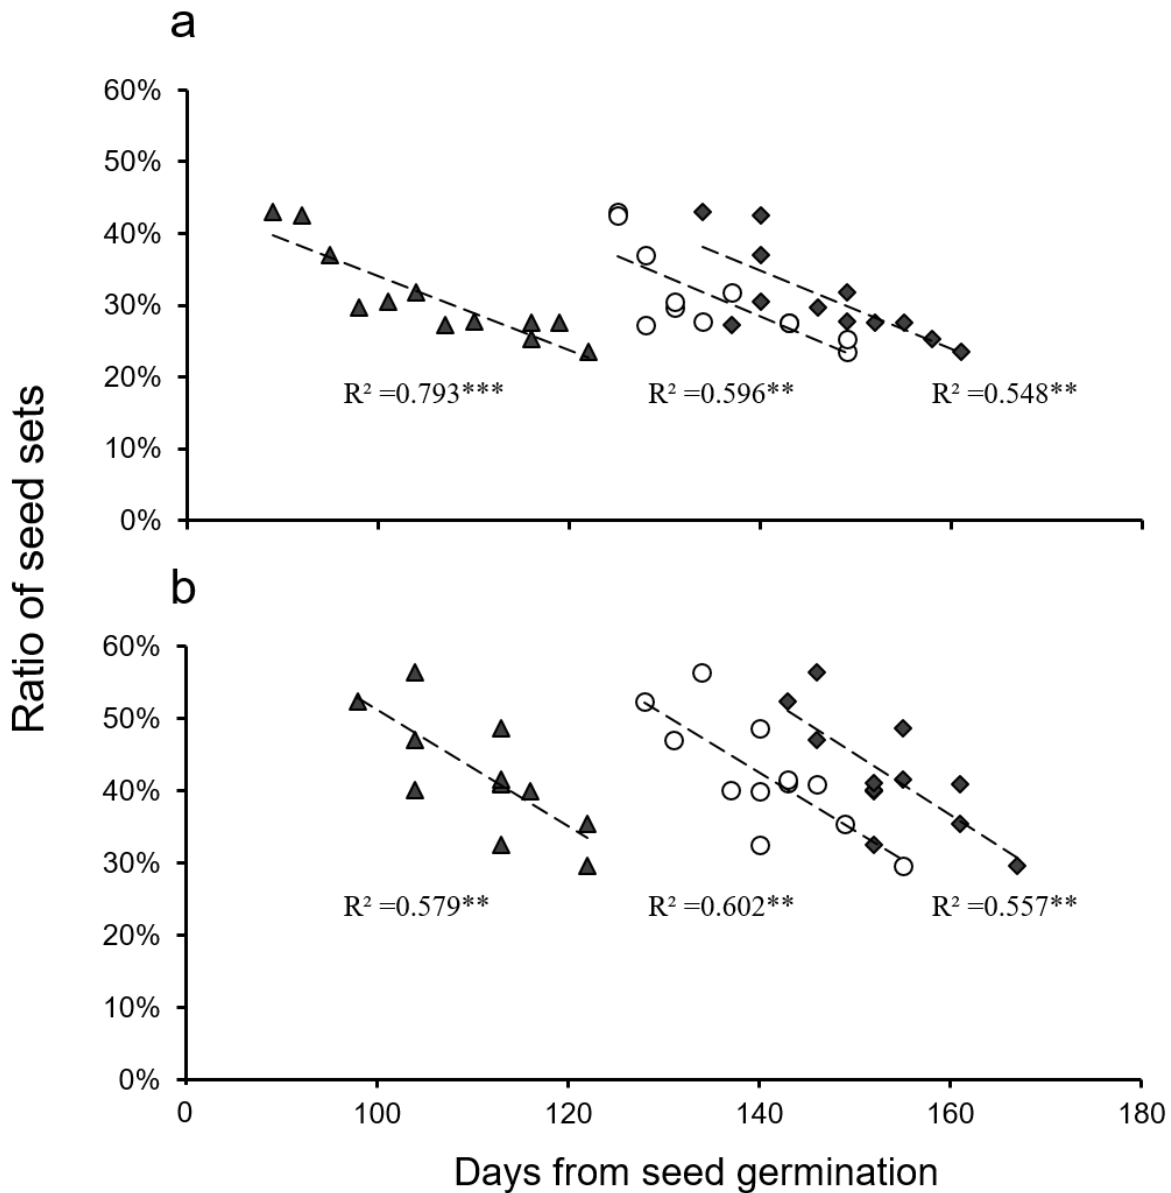

**Figure S1.** Correlations between seed-set ratios and days at which 1% (triangles), 30% (circles) and 50% (diamonds) plants being flowered in WR1-F2 (a) and WR2-F2 (b) rice crop-wild hybrid lineages. R value was calculated based on Pearson Correlation Coefficient, \*\* or \*\*\* indicates significances at the levels of  $P < 0.01$  or  $P < 0.001$ .

**Table S1.** Average values and standard errors ( $\pm$ ) of life-cycle fitness-related traits of the wild rice (*Oryza rufipogon*) parent, F<sub>1</sub>-F<sub>2</sub> transgenic and non-transgenic crop-wild hybrid lineages in pure-planting. Comparisons were made between transgenic and non-transgenic hybrid lineages based on the independent *t*-test (N=6). \*, \*\* or \*\*\* indicates significances at the levels of P<0.05, P<0.01 or P<0.001.

| Trait                            | WR1 combination  |                    |                        | WR2 combination  |                    |                        |
|----------------------------------|------------------|--------------------|------------------------|------------------|--------------------|------------------------|
|                                  | WR1 parent       | Transgenic lineage | Non-transgenic lineage | WR2 parent       | Transgenic lineage | Non-transgenic lineage |
| <b>F1 experiment</b>             |                  |                    |                        |                  |                    |                        |
| Plant height (cm)                | 137.1 $\pm$ 2.9  | 169.4 $\pm$ 2.8    | 168.8 $\pm$ 5.2        | 134.5 $\pm$ 1.6  | 168.0 $\pm$ 5.6    | 171.3 $\pm$ 5.8        |
| No. tillers per plant-30 days    | 9.8 $\pm$ 0.4    | 30.1 $\pm$ 2.2     | 21.8 $\pm$ 1.6 *       | 13.3 $\pm$ 0.6   | 23.6 $\pm$ 1.0     | 18.2 $\pm$ 0.6 ***     |
| No. tillers per plant-60 days    | 65.0 $\pm$ 3.4   | 68.8 $\pm$ 2.0     | 54.8 $\pm$ 2.0 ***     | 65.0 $\pm$ 4.0   | 66.5 $\pm$ 3.0     | 55.9 $\pm$ 2.4 *       |
| No. tillers per plant-150 days   | 80.7 $\pm$ 6.0   | 86.0 $\pm$ 2.5     | 68.5 $\pm$ 2.4 ***     | 82.1 $\pm$ 3.6   | 83.2 $\pm$ 3.8     | 69.8 $\pm$ 3.0 *       |
| Days for 1% plants to flower     | 173.7 $\pm$ 0.3  | 153.0 $\pm$ 1.0    | 156.0 $\pm$ 0.6 *      | 176.5 $\pm$ 0.4  | 154.5 $\pm$ 1.4    | 157.5 $\pm$ 1.2        |
| Days for 30% plants to flower    | 176.7 $\pm$ 0.3  | 158.0 $\pm$ 1.3    | 161.5 $\pm$ 0.9        | 179.7 $\pm$ 0.3  | 161.5 $\pm$ 1.2    | 164.0 $\pm$ 1.1        |
| Days for 50% plants to flower    | 177.0 $\pm$ 0.4  | 160.5 $\pm$ 1.6    | 163.5 $\pm$ 0.9        | 180.2 $\pm$ 0.3  | 165.0 $\pm$ 1.5    | 168.0 $\pm$ 0.6        |
| No. panicles per plant           | 63.0 $\pm$ 3.7   | 55.6 $\pm$ 3.4     | 47.7 $\pm$ 1.6         | 70.9 $\pm$ 6.7   | 59.6 $\pm$ 4.0     | 48.9 $\pm$ 2.8         |
| No. seeds per plant              | 640.0 $\pm$ 67.0 | 1817.4 $\pm$ 149.7 | 1499.9 $\pm$ 143.6     | 815.6 $\pm$ 96.9 | 1288.1 $\pm$ 113.4 | 1125.3 $\pm$ 96.0      |
| 1000-seed weight (g)             | 16.5 $\pm$ 0.1   | 20.8 $\pm$ 0.2     | 21.3 $\pm$ 0.4         | 14.9 $\pm$ 0.1   | 20.7 $\pm$ 0.4     | 20.7 $\pm$ 0.2         |
| Ratio of seed set (%)            | 66.7 $\pm$ 4.3   | 34.0 $\pm$ 1.3     | 26.4 $\pm$ 1.8 **      | 63.4 $\pm$ 3.1   | 40.7 $\pm$ 1.7     | 39.9 $\pm$ 2.0         |
| Ratio of tiller regeneration (%) | 224.7 $\pm$ 28.9 | 86.7 $\pm$ 12.9    | 56.0 $\pm$ 6.7 *       | 254.6 $\pm$ 20.1 | 70.4 $\pm$ 8.6     | 60.9 $\pm$ 5.8         |
| <b>F2 experiment</b>             |                  |                    |                        |                  |                    |                        |
| Plant height (cm)                | 84.7 $\pm$ 3.0   | 131.9 $\pm$ 1.1    | 132.4 $\pm$ 5.9        | 90.4 $\pm$ 6.6   | 138.7 $\pm$ 3.2    | 144.1 $\pm$ 3.4        |
| No. tillers per plant-30 days    | 16.0 $\pm$ 0.8   | 29.1 $\pm$ 0.9     | 24.9 $\pm$ 1.4 *       | 18.9 $\pm$ 1.0   | 28.2 $\pm$ 0.9     | 24.3 $\pm$ 1.0 *       |
| No. tillers per plant-60 days    | 36.6 $\pm$ 3.2   | 85.4 $\pm$ 4.4     | 77.2 $\pm$ 5.9         | 51.5 $\pm$ 7.6   | 84.5 $\pm$ 4.4     | 76.0 $\pm$ 3.3         |
| No. tillers per plant-150 days   | 50.4 $\pm$ 4.4   | 103.4 $\pm$ 2.9    | 89.4 $\pm$ 4.0 *       | 71.7 $\pm$ 8.0   | 94.7 $\pm$ 2.5     | 88.7 $\pm$ 3.5         |
| Days for 1% plants to flower     | 169.2 $\pm$ 0.3  | 97.5 $\pm$ 2.8     | 114.0 $\pm$ 3.1 **     | 172.2 $\pm$ 0.3  | 106.5 $\pm$ 2.7    | 116.0 $\pm$ 1.9 *      |
| Days for 30% plants to flower    | 173.2 $\pm$ 0.3  | 129.0 $\pm$ 1.8    | 141.5 $\pm$ 3.1 **     | 175.2 $\pm$ 0.3  | 135.0 $\pm$ 2.0    | 146.0 $\pm$ 2.2 **     |
| Days for 50% plants to flower    | 174.0 $\pm$ 0.3  | 141.0 $\pm$ 2.3    | 152.5 $\pm$ 3.0 *      | 175.8 $\pm$ 0.3  | 149.0 $\pm$ 1.9    | 158.0 $\pm$ 2.4 *      |
| No. panicles per plant           | 22.7 $\pm$ 2.5   | 89.0 $\pm$ 2.6     | 78.5 $\pm$ 3.7 *       | 40.8 $\pm$ 6.2   | 88.0 $\pm$ 2.8     | 80.4 $\pm$ 3.8         |
| No. seeds per plant              | 253.0 $\pm$ 35.7 | 1991.8 $\pm$ 167.7 | 1571.1 $\pm$ 49.0 *    | 430.2 $\pm$ 68.4 | 3067.3 $\pm$ 171.1 | 2568.0 $\pm$ 180.3     |
| 1000-seed weight (g)             | 17.6 $\pm$ 0.5   | 20.5 $\pm$ 0.3     | 20.7 $\pm$ 0.4         | 15.1 $\pm$ 0.4   | 19.8 $\pm$ 0.3     | 19.7 $\pm$ 0.4         |
| Ratio of seed set (%)            | 48.5 $\pm$ 1.9   | 35.2 $\pm$ 2.7     | 27.0 $\pm$ 1.0 *       | 44.1 $\pm$ 3.3   | 47.4 $\pm$ 2.7     | 36.8 $\pm$ 2.1 b *     |
| Ratio of tiller regeneration (%) | 189.8 $\pm$ 15.5 | 46.4 $\pm$ 13.4    | 12.4 $\pm$ 3.5 *       | 228.7 $\pm$ 20.2 | 17.2 $\pm$ 2.8     | 14.5 $\pm$ 4.7         |

**Table S2.** Average values and standard errors ( $\pm$ ) of life-cycle fitness-related traits of F<sub>1</sub> transgenic and non-transgenic crop-wild hybrid lineages of rice in mix-planting with different densities. Comparisons were made between transgenic and non-transgenic hybrid lineages based on the paired *t*-test (N=6). \* or \*\* indicates significances at the levels of P<0.05 or P<0.01.

| Trait                          | WR1 combination    |                        | WR2 combination    |                        |
|--------------------------------|--------------------|------------------------|--------------------|------------------------|
|                                | Transgenic lineage | Non-transgenic lineage | Transgenic lineage | Non-transgenic lineage |
| <b>50cm spacing</b>            |                    |                        |                    |                        |
| Plant height (cm)              | 192.4 $\pm$ 2.7    | 189.8 $\pm$ 1.5        | 178.0 $\pm$ 4.2    | 181.9 $\pm$ 5.2        |
| No. tillers per plant-30 days  | 28.3 $\pm$ 2.0     | 22.4 $\pm$ 1.8 *       | 22.0 $\pm$ 1.5     | 16.2 $\pm$ 1.0 *       |
| No. tillers per plant-60 days  | 84.2 $\pm$ 2.8     | 75.6 $\pm$ 4.1 *       | 85.5 $\pm$ 5.0     | 71.9 $\pm$ 3.4         |
| No. tillers per plant-150 days | 90.1 $\pm$ 3.7     | 76.8 $\pm$ 3.6 *       | 86.8 $\pm$ 3.4     | 76.8 $\pm$ 3.5 *       |
| No. panicles per plant         | 62.8 $\pm$ 3.0     | 56.9 $\pm$ 3.0         | 60.2 $\pm$ 2.8     | 52.7 $\pm$ 3.7         |
| No. seeds per plant            | 1820.6 $\pm$ 157.6 | 1585.6 $\pm$ 108.2     | 1604.6 $\pm$ 134.9 | 1572.2 $\pm$ 125.2     |
| 1000-seed weight (g)           | 21.7 $\pm$ 0.2     | 21.4 $\pm$ 0.2         | 21.5 $\pm$ 0.3     | 20.6 $\pm$ 0.4 *       |
| Ratio of seed set (%)          | 46.5 $\pm$ 3.4     | 42.8 $\pm$ 2.0         | 36.4 $\pm$ 2.0     | 36.7 $\pm$ 2.6         |
| <b>40cm spacing</b>            |                    |                        |                    |                        |
| Plant height (cm)              | 180.9 $\pm$ 4.5    | 178.5 $\pm$ 5.5        | 172.2 $\pm$ 4.9    | 165.3 $\pm$ 2.9        |
| No. tillers per plant-30 days  | 26.1 $\pm$ 1.8     | 18.3 $\pm$ 1.3 *       | 21.4 $\pm$ 2.0     | 14.5 $\pm$ 1.2 **      |
| No. tillers per plant-60 days  | 66.5 $\pm$ 2.8     | 59.4 $\pm$ 2.0 *       | 70.7 $\pm$ 6.4     | 53.2 $\pm$ 5.2 *       |
| No. tillers per plant-150 days | 79.7 $\pm$ 5.8     | 65.9 $\pm$ 3.7 *       | 77.8 $\pm$ 5.2     | 64.5 $\pm$ 4.2 *       |
| No. panicles per plant         | 39.2 $\pm$ 3.9     | 34.0 $\pm$ 3.1         | 51.0 $\pm$ 5.2     | 41.4 $\pm$ 3.5 *       |
| No. seeds per plant            | 1431.1 $\pm$ 117.5 | 1145.4 $\pm$ 91.8      | 1213.8 $\pm$ 89.2  | 1061.1 $\pm$ 71.3      |
| 1000-seed weight (g)           | 21.7 $\pm$ 0.2     | 21.5 $\pm$ 0.3         | 21.1 $\pm$ 0.4     | 21.0 $\pm$ 0.4         |
| Ratio of seed set (%)          | 45.0 $\pm$ 2.3     | 42.5 $\pm$ 2.2         | 35.6 $\pm$ 2.7     | 34.7 $\pm$ 1.5         |
| <b>30cm spacing</b>            |                    |                        |                    |                        |
| Plant height (cm)              | 167.4 $\pm$ 3.8    | 166.6 $\pm$ 2.7        | 171.0 $\pm$ 2.2    | 166.9 $\pm$ 2.3        |
| No. tillers per plant-30 days  | 22.9 $\pm$ 2.4     | 15.4 $\pm$ 0.5 *       | 19.1 $\pm$ 1.5     | 14.1 $\pm$ 1.1 **      |
| No. tillers per plant-60 days  | 45.2 $\pm$ 4.4     | 31.2 $\pm$ 2.3 *       | 45.2 $\pm$ 4.0     | 33.9 $\pm$ 2.6 **      |
| No. tillers per plant-150 days | 47.3 $\pm$ 2.0     | 36.3 $\pm$ 1.5 *       | 55.4 $\pm$ 3.7     | 44.0 $\pm$ 3.0 **      |
| No. panicles per plant         | 30.7 $\pm$ 1.5     | 23.2 $\pm$ 1.1 *       | 41.2 $\pm$ 3.1     | 32.9 $\pm$ 2.2 **      |
| No. seeds per plant            | 1146.6 $\pm$ 125.5 | 874.5 $\pm$ 89.3 *     | 1046.0 $\pm$ 48.4  | 863.5 $\pm$ 65.2 **    |
| 1000-seed weight (g)           | 21.6 $\pm$ 0.2     | 21.8 $\pm$ 0.2         | 21.5 $\pm$ 0.2     | 21.4 $\pm$ 0.4         |
| Ratio of seed set (%)          | 40.2 $\pm$ 0.8     | 36.5 $\pm$ 2.2         | 50.8 $\pm$ 4.0     | 50.7 $\pm$ 2.8         |

**Table S3.** Average values and standard errors ( $\pm$ ) of life-cycle fitness-related traits of F<sub>2</sub> transgenic and non-transgenic crop-wild hybrid lineages of rice in mix-planting (density of 30cm  $\times$  30cm). Comparisons were made between transgenic and non-transgenic hybrid lineages based on the paired *t*-test (N=6). \* or \*\* indicates significances at the levels of P<0.05 or P<0.01.

| Trait                          | WR1 combination    |                        | WR2 combination    |                        |
|--------------------------------|--------------------|------------------------|--------------------|------------------------|
|                                | Transgenic lineage | Non-transgenic lineage | Transgenic lineage | Non-transgenic lineage |
| Plant height (cm)              | 127.5 $\pm$ 4.7    | 124.4 $\pm$ 4.1        | 127.8 $\pm$ 1.7    | 121.3 $\pm$ 6.9        |
| No. tillers per plant-30 days  | 26.3 $\pm$ 0.5     | 24.1 $\pm$ 0.4 *       | 25.4 $\pm$ 1.7     | 23.3 $\pm$ 1.4 *       |
| No. tillers per plant-60 days  | 37.8 $\pm$ 1.2     | 30.4 $\pm$ 1.1 **      | 37.1 $\pm$ 2.8     | 30.6 $\pm$ 1.3 *       |
| No. tillers per plant-150 days | 52.6 $\pm$ 1.5     | 45.8 $\pm$ 1.1 **      | 50.2 $\pm$ 2.5     | 43.5 $\pm$ 0.9 *       |
| No. panicles per plant         | 46.0 $\pm$ 0.7     | 39.6 $\pm$ 2.0 *       | 45.2 $\pm$ 2.1     | 39.4 $\pm$ 0.4 *       |
| No. seeds per plant            | 1124.7 $\pm$ 90.3  | 814.3 $\pm$ 72.3 **    | 1424.8 $\pm$ 163.2 | 1105.0 $\pm$ 145.5 **  |
| 1000-seed weight (g)           | 20.4 $\pm$ 0.2     | 20.6 $\pm$ 0.5         | 19.6 $\pm$ 0.7     | 19.0 $\pm$ 0.3         |
| Ratio of seed set (%)          | 34.5 $\pm$ 3.2     | 28.0 $\pm$ 2.5 *       | 39.8 $\pm$ 3.0     | 30.6 $\pm$ 4.0 *       |

**Table S4.** Glyphosate-resistance (based on ED50 estimates), content of endogenous EPSPS protein and performance of yield-related traits of two transgenic rice lines (EP3 and EP4) and their parental rice line (Minghui-86). Seedlings at three-leaf stage were used for the testing of glyphosate-resistance. Mean±SE was shown for fecundity-related traits (N=5 plots). Comparisons were made among different rice lines for yield-related traits using Duncan's multiple range test. Groups that do not share letters are significantly different at P<0.05.

| Rice line  | LD50 (mmol/L) | EPSPS protein (%) | No. of panicles | No. of filled seeds |
|------------|---------------|-------------------|-----------------|---------------------|
| EP3        | 17.00         | 0.60~0.61         | 9.2±0.4 a       | 774.8±42.5 a        |
| EP4        | 8.90          | --                | 8.2±0.2 ab      | 730.4±32.6 a        |
| Minghui-86 | 4.38          | 0.21~0.39         | 7.0±0.3 b       | 620.8±9.1 b         |

**Table S5.** Phenological and fitness-related characters measured in the common-garden field experiments.

| Trait measured                                       | Method of measurement                                                                                                                                                                                                                                                   |
|------------------------------------------------------|-------------------------------------------------------------------------------------------------------------------------------------------------------------------------------------------------------------------------------------------------------------------------|
| Plant height (cm)                                    | Height from the base (ground) of a plant to the leaf tip of main tiller measured at maturity                                                                                                                                                                            |
| No. tillers per plant                                | Tiller number of a plant that measured three times at 30, 60, and 150 days after transplanting                                                                                                                                                                          |
| Days for different present of plants to flower (day) | Number of days from seed germination to flowering was recorded for each plant in pure-planting, then the days at which 1%, 30%, and 50% plants in a plot being flowered was calculated                                                                                  |
| No. of panicles per plant                            | Panicles number of a plant measured at panicle maturity                                                                                                                                                                                                                 |
| No. of seeds per plant                               | Number of well-developed (filled) seeds of a plant measured at panicle maturity                                                                                                                                                                                         |
| 1000-seed weight (g)                                 | Weight in grams of 1000 filled seeds measured based on sampling and weighing 100 randomly selected seeds three times from the same plant                                                                                                                                |
| Ratio of seed set (%)                                | Ratio between the number of filled seeds and the total number of spikelets harvested from a plant                                                                                                                                                                       |
| Ratio of buried-seed germination (%)                 | Seeds taken out from soil were soaked in moist filter papers in a petri dish and placed in oven with 30 Celsius degrees for two days; then the seeds were moved out to measure the seed germination ratio in each bag                                                   |
| Ratio of tiller regeneration (%)                     | Ratio between the number of early-regenerated tillers in second year and the total number of final tillers of a plant in the first year. The number of early-regenerated tillers per plant was measured in early March of each experimental year in pure planting plots |
